# Supplementary material
Source: Springer Nature journal article supplement (https://www.springermedizin.de/resource/supplementary/12874_2005_119_MOESM7_ESM.pdf/9433808)

# Neuropathic pain

3c

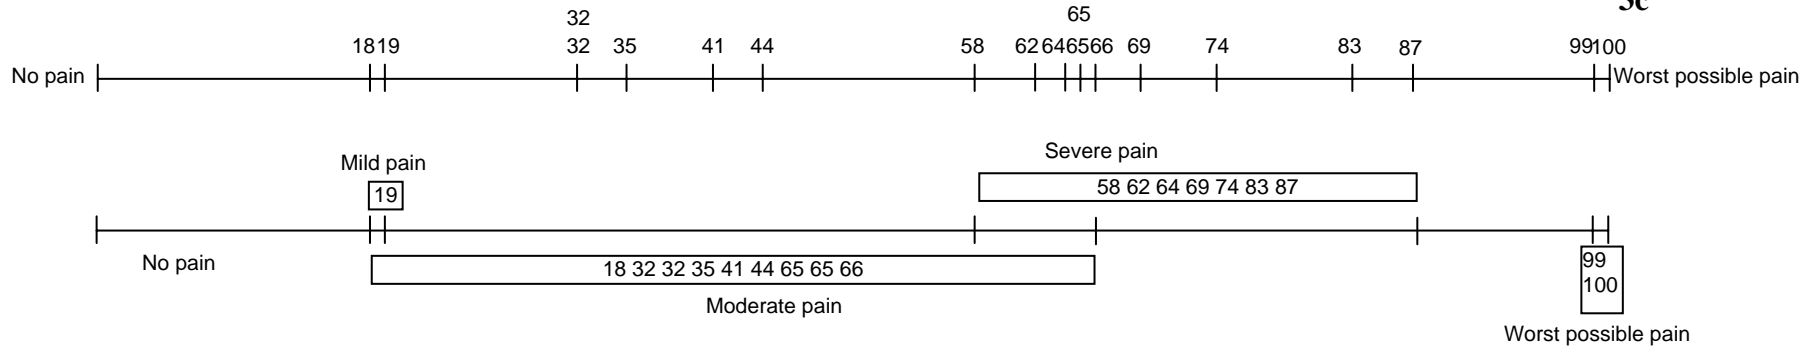

## Unbiased VAS vs VRS

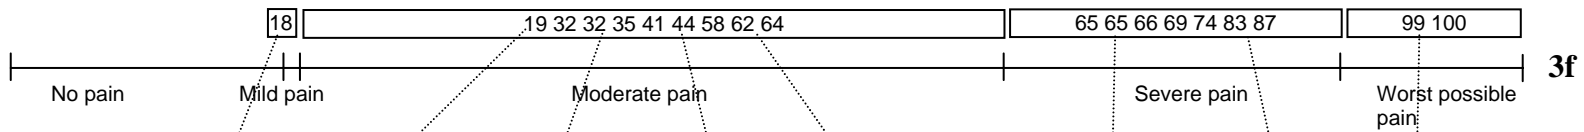

## Equidistant VAS vs VRS

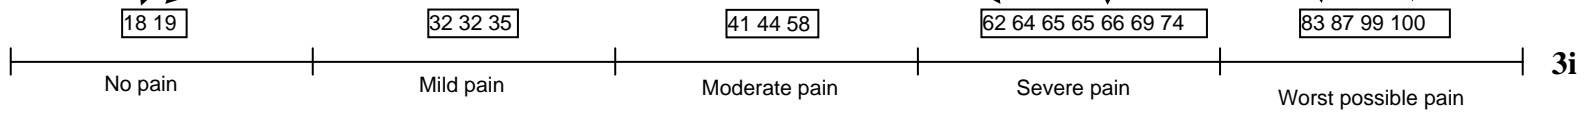

Supplement: MOESM7 [file 9433808]
